# Supplementary material for: Polymetallic nodules, sediments, and deep waters in the equatorial North Pacific exhibit highly diverse and distinct bacterial, archaeal, and microeukaryotic communities
Source: PubMed Central journal article supplement (PMC5387330; doi:10.1002/mbo3.428), 2016-11-21
Supplement: MBO3-6-na-s011.pdf [file MBO3-6-na-s011.pdf]

**Table S1** OTU and species richness estimates at sampling depths of 2,401,000 and 100,100 sequences for prokaryotes and eukaryotes, respectively.

|                            | Observed OTUs | Chao1   | Exponential of Shannon's |
|----------------------------|---------------|---------|--------------------------|
| Water column (prokaryotes) | 33,732        | 35,083  | 7435                     |
| Nodules (prokaryotes)      | 93,790        | 118,552 | 25,345                   |
| Sediment (prokaryotes)     | 111,413       | 184,335 | 24,443                   |
| Water column (eukaryotes)  | 6704          | 13,373  | 9566                     |
| Nodules (eukaryotes)       | 4744          | 8831    | 3508                     |
| Sediment (eukaryotes)      | 9004          | 15,344  | 22,692                   |
