# Supplementary material for: Polymetallic nodules, sediments, and deep waters in the equatorial North Pacific exhibit highly diverse and distinct bacterial, archaeal, and microeukaryotic communities
Source: PubMed Central journal article supplement (PMC5387330; doi:10.1002/mbo3.428), 2016-11-21
Supplement: MBO3-6-na-s012.pdf [file MBO3-6-na-s012.pdf]

**Table S2** Core prokaryotic OTUs found across 100% of nodule samples analyzed from AB01:

| <b>Greengenes ID</b> | <b>Taxonomic assignment</b>                                                                                            |
|----------------------|------------------------------------------------------------------------------------------------------------------------|
|                      | 657355 [k__Archaea, p__Crenarchaeota, c__Thaumarchaeota, o__Cenarchaeales, f__Cenarchaeaceae, g__, s__]                |
|                      | 741963 [k__Archaea, p__Crenarchaeota, c__Thaumarchaeota, o__Cenarchaeales, f__Cenarchaeaceae, g__, s__]                |
|                      | 182872 [k__Archaea, p__Crenarchaeota, c__Thaumarchaeota, o__Cenarchaeales, f__Cenarchaeaceae, g__, s__]                |
|                      | 776850 [k__Archaea, p__Crenarchaeota, c__Thaumarchaeota, o__Cenarchaeales, f__Cenarchaeaceae, g__, s__]                |
|                      | 1054 [k__Archaea, p__Crenarchaeota, c__Thaumarchaeota, o__Cenarchaeales, f__Cenarchaeaceae, g__, s__]                  |
|                      | 730215 [k__Archaea, p__Crenarchaeota, c__Thaumarchaeota, o__Cenarchaeales, f__Cenarchaeaceae, g__, s__]                |
|                      | 196754 [k__Archaea, p__Crenarchaeota, c__Thaumarchaeota, o__Cenarchaeales, f__Cenarchaeaceae, g__, s__]                |
|                      | 104620 [k__Archaea, p__Crenarchaeota, c__Thaumarchaeota, o__Cenarchaeales, f__Cenarchaeaceae, g__, s__]                |
|                      | 753582 [k__Archaea, p__Crenarchaeota, c__Thaumarchaeota, o__Cenarchaeales, f__Cenarchaeaceae, g__, s__]                |
|                      | 1584736 [k__Archaea, p__Crenarchaeota, c__Thaumarchaeota, o__Cenarchaeales, f__Cenarchaeaceae, g__, s__]               |
| New.ReferenceOTU1359 | [k__Archaea, p__Crenarchaeota, c__Thaumarchaeota, o__Cenarchaeales, f__Cenarchaeaceae, g__, s__]                       |
|                      | 540244 [k__Archaea, p__Crenarchaeota, c__Thaumarchaeota, o__Cenarchaeales, f__Cenarchaeaceae, g__Nitrosopumilus, s__]  |
|                      | 869040 [k__Archaea, p__Crenarchaeota, c__Thaumarchaeota, o__Cenarchaeales, f__Cenarchaeaceae, g__Nitrosopumilus, s__]  |
|                      | 659087 [k__Archaea, p__Crenarchaeota, c__Thaumarchaeota, o__Cenarchaeales, f__Cenarchaeaceae, g__Nitrosopumilus, s__]  |
|                      | 1087314 [k__Archaea, p__Crenarchaeota, c__Thaumarchaeota, o__Cenarchaeales, f__Cenarchaeaceae, g__Nitrosopumilus, s__] |
|                      | 4425583 [k__Archaea, p__Crenarchaeota, c__Thaumarchaeota, o__Cenarchaeales, f__Cenarchaeaceae, g__Nitrosopumilus, s__] |
|                      | 4369009 [k__Archaea, p__Crenarchaeota, c__Thaumarchaeota, o__Cenarchaeales, f__Cenarchaeaceae, g__Nitrosopumilus, s__] |
|                      | 619389 [k__Archaea, p__Crenarchaeota, c__Thaumarchaeota, o__Cenarchaeales, f__Cenarchaeaceae, g__Nitrosopumilus, s__]  |
|                      | 553746 [k__Archaea, p__Crenarchaeota, c__Thaumarchaeota, o__Cenarchaeales, f__Cenarchaeaceae, g__Nitrosopumilus, s__]  |
|                      | 348549 [k__Archaea, p__Crenarchaeota, c__Thaumarchaeota, o__Cenarchaeales, f__Cenarchaeaceae, g__Nitrosopumilus, s__]  |
|                      | 737234 [k__Archaea, p__Crenarchaeota, c__Thaumarchaeota, o__Cenarchaeales, f__Cenarchaeaceae, g__Nitrosopumilus, s__]  |
|                      | 560175 [k__Archaea, p__Crenarchaeota, c__Thaumarchaeota, o__Cenarchaeales, f__Cenarchaeaceae, g__Nitrosopumilus, s__]  |
| New.ReferenceOTU254  | [k__Archaea, p__Crenarchaeota, c__Thaumarchaeota, o__Cenarchaeales, f__Cenarchaeaceae, g__Nitrosopumilus, s__]         |
| New.ReferenceOTU1600 | [k__Archaea, p__Crenarchaeota, c__Thaumarchaeota, o__Cenarchaeales, f__Cenarchaeaceae, g__Nitrosopumilus, s__]         |
|                      | 4352607 [k__Bacteria, p__[Caldithrix], c__KSB1, o__Ucn15732, f__, g__, s__]                                            |
|                      | 262829 [k__Bacteria, p__[Caldithrix], c__KSB1, o__Ucn15732, f__, g__, s__]                                             |
|                      | 272885 [k__Bacteria, p__Acidobacteria, c__[Chloracidobacteria], o__RB41, f__Ellin6075, g__, s__]                       |
|                      | 4037775 [k__Bacteria, p__Acidobacteria, c__Acidobacteria-6, o__BPC015, f__, g__, s__]                                  |
|                      | 2449617 [k__Bacteria, p__Acidobacteria, c__BPC102, o__B110, f__, g__, s__]                                             |
|                      | 4475363 [k__Bacteria, p__Acidobacteria, c__BPC102, o__B110, f__, g__, s__]                                             |
|                      | 1045667 [k__Bacteria, p__Acidobacteria, c__BPC102, o__B110, f__, g__, s__]                                             |
| New.ReferenceOTU1401 | [k__Bacteria, p__Acidobacteria, c__BPC102, o__B110, f__, g__, s__]                                                     |
|                      | 203449 [k__Bacteria, p__Acidobacteria, c__DA052, o__E29, f__, g__, s__]                                                |

1110602 [k\_\_Bacteria, p\_\_Acidobacteria, c\_\_Sva0725, o\_\_Sva0725, f\_\_, g\_\_, s\_\_]  
138174 [k\_\_Bacteria, p\_\_Actinobacteria, c\_\_Acidimicrobiia, o\_\_Acidimicrobiales, f\_\_koll13, g\_\_, s\_\_]  
272708 [k\_\_Bacteria, p\_\_Actinobacteria, c\_\_Acidimicrobiia, o\_\_Acidimicrobiales, f\_\_wb1\_P06, g\_\_, s\_\_]  
4348977 [k\_\_Bacteria, p\_\_Actinobacteria, c\_\_Thermoleophilia, o\_\_Solirubrobacterales, f\_\_, g\_\_, s\_\_]  
568999 [k\_\_Bacteria, p\_\_Bacteroidetes, c\_\_[Rhodothermi], o\_\_[Rhodothermales], f\_\_Rhodothermaceae, g\_\_, s\_\_]  
New.ReferenceOTU91 [k\_\_Bacteria, p\_\_Bacteroidetes, c\_\_[Rhodothermi], o\_\_[Rhodothermales], f\_\_Rhodothermaceae, g\_\_, s\_\_]  
539477 [k\_\_Bacteria, p\_\_Bacteroidetes, c\_\_[Rhodothermi], o\_\_[Rhodothermales], f\_\_Rhodothermaceae, g\_\_Rubricoccus, s\_\_]  
571975 [k\_\_Bacteria, p\_\_Bacteroidetes, c\_\_Cytophagia, o\_\_Cytophagales, f\_\_Flammeovirgaceae, g\_\_, s\_\_]  
550546 [k\_\_Bacteria, p\_\_Bacteroidetes, c\_\_Cytophagia, o\_\_Cytophagales, f\_\_Flammeovirgaceae, g\_\_, s\_\_]  
New.ReferenceOTU1947 [k\_\_Bacteria, p\_\_Bacteroidetes, c\_\_Cytophagia, o\_\_Cytophagales, f\_\_Flammeovirgaceae, g\_\_, s\_\_]  
246587 [k\_\_Bacteria, p\_\_Bacteroidetes, c\_\_Flavobacteriia, o\_\_Flavobacteriales, f\_\_Flavobacteriaceae, g\_\_, s\_\_]  
2582030 [k\_\_Bacteria, p\_\_Chloroflexi, c\_\_SAR202, o\_\_, f\_\_, g\_\_, s\_\_]  
576457 [k\_\_Bacteria, p\_\_Chloroflexi, c\_\_SAR202, o\_\_, f\_\_, g\_\_, s\_\_]  
663206 [k\_\_Bacteria, p\_\_Chloroflexi, c\_\_SAR202, o\_\_, f\_\_, g\_\_, s\_\_]  
2585229 [k\_\_Bacteria, p\_\_Chloroflexi, c\_\_SAR202, o\_\_, f\_\_, g\_\_, s\_\_]  
20758 [k\_\_Bacteria, p\_\_Chloroflexi, c\_\_SAR202, o\_\_, f\_\_, g\_\_, s\_\_]  
554951 [k\_\_Bacteria, p\_\_Chloroflexi, c\_\_SAR202, o\_\_, f\_\_, g\_\_, s\_\_]  
New.ReferenceOTU2440 [k\_\_Bacteria, p\_\_Chloroflexi, c\_\_SAR202, o\_\_, f\_\_, g\_\_, s\_\_]  
4417556 [k\_\_Bacteria, p\_\_Gemmatimonadetes, c\_\_Gemm-1, o\_\_, f\_\_, g\_\_, s\_\_]  
New.ReferenceOTU1911 [k\_\_Bacteria, p\_\_Gemmatimonadetes, c\_\_Gemm-1, o\_\_, f\_\_, g\_\_, s\_\_]  
New.ReferenceOTU1866 [k\_\_Bacteria, p\_\_Gemmatimonadetes, c\_\_Gemm-1, o\_\_, f\_\_, g\_\_, s\_\_]  
537373 [k\_\_Bacteria, p\_\_Gemmatimonadetes, c\_\_Gemm-2, o\_\_, f\_\_, g\_\_, s\_\_]  
358080 [k\_\_Bacteria, p\_\_Gemmatimonadetes, c\_\_Gemm-2, o\_\_, f\_\_, g\_\_, s\_\_]  
4256117 [k\_\_Bacteria, p\_\_Gemmatimonadetes, c\_\_Gemm-2, o\_\_, f\_\_, g\_\_, s\_\_]  
565523 [k\_\_Bacteria, p\_\_Gemmatimonadetes, c\_\_Gemm-4, o\_\_, f\_\_, g\_\_, s\_\_]  
244505 [k\_\_Bacteria, p\_\_Gemmatimonadetes, c\_\_Gemm-4, o\_\_, f\_\_, g\_\_, s\_\_]  
1591289 [k\_\_Bacteria, p\_\_Gemmatimonadetes, c\_\_Gemm-4, o\_\_, f\_\_, g\_\_, s\_\_]  
New.ReferenceOTU2053 [k\_\_Bacteria, p\_\_Gemmatimonadetes, c\_\_Gemm-4, o\_\_, f\_\_, g\_\_, s\_\_]  
1449 [k\_\_Bacteria, p\_\_Nitrospirae, c\_\_Nitrospira, o\_\_Nitrospirales, f\_\_Nitrospiraceae, g\_\_, s\_\_]  
4335834 [k\_\_Bacteria, p\_\_Nitrospirae, c\_\_Nitrospira, o\_\_Nitrospirales, f\_\_Nitrospiraceae, g\_\_, s\_\_]  
237590 [k\_\_Bacteria, p\_\_Nitrospirae, c\_\_Nitrospira, o\_\_Nitrospirales, f\_\_Nitrospiraceae, g\_\_, s\_\_]  
552101 [k\_\_Bacteria, p\_\_OP3, c\_\_koll11, o\_\_GIF10, f\_\_kpj58rc, g\_\_, s\_\_]  
New.ReferenceOTU1317 [k\_\_Bacteria, p\_\_Planctomycetes, c\_\_BD7-11, o\_\_, f\_\_, g\_\_, s\_\_]  
704361 [k\_\_Bacteria, p\_\_Planctomycetes, c\_\_Phycisphaerae, o\_\_C86, f\_\_, g\_\_, s\_\_]  
272431 [k\_\_Bacteria, p\_\_Planctomycetes, c\_\_Phycisphaerae, o\_\_Phycisphaerales, f\_\_, g\_\_, s\_\_]

124913 [k\_Bacteria, p\_Planctomycetes, c\_Phycisphaerae, o\_Phycisphaerales, f\_, g\_, s\_]  
3211673 [k\_Bacteria, p\_Planctomycetes, c\_Phycisphaerae, o\_S-70, f\_, g\_, s\_]  
263866 [k\_Bacteria, p\_Planctomycetes, c\_Planctomycetia, o\_Pirellulales, f\_Pirellulaceae, g\_, s\_]  
364773 [k\_Bacteria, p\_Planctomycetes, c\_Planctomycetia, o\_Pirellulales, f\_Pirellulaceae, g\_, s\_]  
New.ReferenceOTU1438 [k\_Bacteria, p\_Planctomycetes, c\_Planctomycetia, o\_Pirellulales, f\_Pirellulaceae, g\_, s\_]  
4307148 [k\_Bacteria, p\_Planctomycetes, c\_Planctomycetia, o\_Pirellulales, f\_Pirellulaceae, g\_A17, s\_]  
719818 [k\_Bacteria, p\_Planctomycetes, c\_Planctomycetia, o\_Pirellulales, f\_Pirellulaceae, g\_A17, s\_]  
266612 [k\_Bacteria, p\_Proteobacteria, c\_Alphaproteobacteria, o\_, f\_, g\_, s\_]  
265780 [k\_Bacteria, p\_Proteobacteria, c\_Alphaproteobacteria, o\_, f\_, g\_, s\_]  
1123043 [k\_Bacteria, p\_Proteobacteria, c\_Alphaproteobacteria, o\_, f\_, g\_, s\_]  
138344 [k\_Bacteria, p\_Proteobacteria, c\_Alphaproteobacteria, o\_, f\_, g\_, s\_]  
567782 [k\_Bacteria, p\_Proteobacteria, c\_Alphaproteobacteria, o\_, f\_, g\_, s\_]  
95741 [k\_Bacteria, p\_Proteobacteria, c\_Alphaproteobacteria, o\_, f\_, g\_, s\_]  
3223711 [k\_Bacteria, p\_Proteobacteria, c\_Alphaproteobacteria, o\_, f\_, g\_, s\_]  
831594 [k\_Bacteria, p\_Proteobacteria, c\_Alphaproteobacteria, o\_, f\_, g\_, s\_]  
1083150 [k\_Bacteria, p\_Proteobacteria, c\_Alphaproteobacteria, o\_, f\_, g\_, s\_]  
718100 [k\_Bacteria, p\_Proteobacteria, c\_Alphaproteobacteria, o\_, f\_, g\_, s\_]  
565274 [k\_Bacteria, p\_Proteobacteria, c\_Alphaproteobacteria, o\_, f\_, g\_, s\_]  
543882 [k\_Bacteria, p\_Proteobacteria, c\_Alphaproteobacteria, o\_, f\_, g\_, s\_]  
819552 [k\_Bacteria, p\_Proteobacteria, c\_Alphaproteobacteria, o\_, f\_, g\_, s\_]  
4423336 [k\_Bacteria, p\_Proteobacteria, c\_Alphaproteobacteria, o\_, f\_, g\_, s\_]  
2644916 [k\_Bacteria, p\_Proteobacteria, c\_Alphaproteobacteria, o\_, f\_, g\_, s\_]  
583912 [k\_Bacteria, p\_Proteobacteria, c\_Alphaproteobacteria, o\_, f\_, g\_, s\_]  
New.ReferenceOTU1855 [k\_Bacteria, p\_Proteobacteria, c\_Alphaproteobacteria, o\_, f\_, g\_, s\_]  
New.ReferenceOTU2553 [k\_Bacteria, p\_Proteobacteria, c\_Alphaproteobacteria, o\_, f\_, g\_, s\_]  
4385354 [k\_Bacteria, p\_Proteobacteria, c\_Alphaproteobacteria, o\_Rhizobiales, f\_, g\_, s\_]  
4385422 [k\_Bacteria, p\_Proteobacteria, c\_Alphaproteobacteria, o\_Rhizobiales, f\_Hyphomicrobiaceae, g\_, s\_]  
272493 [k\_Bacteria, p\_Proteobacteria, c\_Alphaproteobacteria, o\_Rhizobiales, f\_Hyphomicrobiaceae, g\_, s\_]  
3768672 [k\_Bacteria, p\_Proteobacteria, c\_Alphaproteobacteria, o\_Rhizobiales, f\_Hyphomicrobiaceae, g\_, s\_]  
171619 [k\_Bacteria, p\_Proteobacteria, c\_Alphaproteobacteria, o\_Rhizobiales, f\_Hyphomicrobiaceae, g\_Hyphomicrobium, s\_]  
260794 [k\_Bacteria, p\_Proteobacteria, c\_Alphaproteobacteria, o\_Rhizobiales, f\_Hyphomicrobiaceae, g\_Hyphomicrobium, s\_]  
863772 [k\_Bacteria, p\_Proteobacteria, c\_Alphaproteobacteria, o\_Rhizobiales, f\_Hyphomicrobiaceae, g\_Hyphomicrobium, s\_]  
New.ReferenceOTU2844 [k\_Bacteria, p\_Proteobacteria, c\_Alphaproteobacteria, o\_Rhizobiales, f\_Hyphomicrobiaceae]  
5807 [k\_Bacteria, p\_Proteobacteria, c\_Alphaproteobacteria, o\_Rhodobacterales, f\_Rhodobacteraceae, g\_, s\_]  
4348883 [k\_Bacteria, p\_Proteobacteria, c\_Alphaproteobacteria, o\_Rhodospirillales, f\_Rhodospirillaceae, g\_, s\_]

3708318 [k\_\_Bacteria, p\_\_Proteobacteria, c\_\_Alphaproteobacteria, o\_\_Rhodospirillales, f\_\_Rhodospirillaceae, g\_\_, s\_\_]  
277135 [k\_\_Bacteria, p\_\_Proteobacteria, c\_\_Alphaproteobacteria, o\_\_Rhodospirillales, f\_\_Rhodospirillaceae, g\_\_, s\_\_]  
734841 [k\_\_Bacteria, p\_\_Proteobacteria, c\_\_Alphaproteobacteria, o\_\_Rhodospirillales, f\_\_Rhodospirillaceae, g\_\_, s\_\_]  
1118195 [k\_\_Bacteria, p\_\_Proteobacteria, c\_\_Alphaproteobacteria, o\_\_Rhodospirillales, f\_\_Rhodospirillaceae, g\_\_, s\_\_]  
757981 [k\_\_Bacteria, p\_\_Proteobacteria, c\_\_Alphaproteobacteria, o\_\_Rhodospirillales, f\_\_Rhodospirillaceae, g\_\_, s\_\_]  
669611 [k\_\_Bacteria, p\_\_Proteobacteria, c\_\_Alphaproteobacteria, o\_\_Rhodospirillales, f\_\_Rhodospirillaceae, g\_\_, s\_\_]  
569704 [k\_\_Bacteria, p\_\_Proteobacteria, c\_\_Alphaproteobacteria, o\_\_Rhodospirillales, f\_\_Rhodospirillaceae, g\_\_, s\_\_]  
4423338 [k\_\_Bacteria, p\_\_Proteobacteria, c\_\_Alphaproteobacteria, o\_\_Rhodospirillales, f\_\_Rhodospirillaceae, g\_\_, s\_\_]  
569555 [k\_\_Bacteria, p\_\_Proteobacteria, c\_\_Alphaproteobacteria, o\_\_Rhodospirillales, f\_\_Rhodospirillaceae, g\_\_, s\_\_]  
4413241 [k\_\_Bacteria, p\_\_Proteobacteria, c\_\_Alphaproteobacteria, o\_\_Rhodospirillales, f\_\_Rhodospirillaceae, g\_\_, s\_\_]  
682480 [k\_\_Bacteria, p\_\_Proteobacteria, c\_\_Alphaproteobacteria, o\_\_Rhodospirillales, f\_\_Rhodospirillaceae, g\_\_, s\_\_]  
837201 [k\_\_Bacteria, p\_\_Proteobacteria, c\_\_Alphaproteobacteria, o\_\_Rhodospirillales, f\_\_Rhodospirillaceae, g\_\_, s\_\_]  
278297 [k\_\_Bacteria, p\_\_Proteobacteria, c\_\_Alphaproteobacteria, o\_\_Rhodospirillales, f\_\_Rhodospirillaceae, g\_\_, s\_\_]  
3582703 [k\_\_Bacteria, p\_\_Proteobacteria, c\_\_Alphaproteobacteria, o\_\_Rhodospirillales, f\_\_Rhodospirillaceae, g\_\_, s\_\_]  
200860 [k\_\_Bacteria, p\_\_Proteobacteria, c\_\_Alphaproteobacteria, o\_\_Rhodospirillales, f\_\_Rhodospirillaceae, g\_\_, s\_\_]  
693333 [k\_\_Bacteria, p\_\_Proteobacteria, c\_\_Alphaproteobacteria, o\_\_Rhodospirillales, f\_\_Rhodospirillaceae, g\_\_, s\_\_]  
2632957 [k\_\_Bacteria, p\_\_Proteobacteria, c\_\_Alphaproteobacteria, o\_\_Rhodospirillales, f\_\_Rhodospirillaceae, g\_\_, s\_\_]  
New.ReferenceOTU103 [k\_\_Bacteria, p\_\_Proteobacteria, c\_\_Alphaproteobacteria, o\_\_Rhodospirillales, f\_\_Rhodospirillaceae, g\_\_, s\_\_]  
New.ReferenceOTU1642 [k\_\_Bacteria, p\_\_Proteobacteria, c\_\_Alphaproteobacteria, o\_\_Rhodospirillales, f\_\_Rhodospirillaceae, g\_\_, s\_\_]  
New.ReferenceOTU1977 [k\_\_Bacteria, p\_\_Proteobacteria, c\_\_Alphaproteobacteria, o\_\_Rhodospirillales, f\_\_Rhodospirillaceae, g\_\_, s\_\_]  
New.ReferenceOTU87 [k\_\_Bacteria, p\_\_Proteobacteria, c\_\_Alphaproteobacteria, o\_\_Rhodospirillales, f\_\_Rhodospirillaceae, g\_\_, s\_\_]  
4395653 [k\_\_Bacteria, p\_\_Proteobacteria, c\_\_Betaproteobacteria, o\_\_Nitrosomonadales, f\_\_Nitrosomonadaceae, g\_\_, s\_\_]  
145637 [k\_\_Bacteria, p\_\_Proteobacteria, c\_\_Betaproteobacteria, o\_\_Nitrosomonadales, f\_\_Nitrosomonadaceae, g\_\_, s\_\_]  
New.ReferenceOTU1086 [k\_\_Bacteria, p\_\_Proteobacteria, c\_\_Betaproteobacteria, o\_\_Rhodocyclales, f\_\_Rhodocyclaceae]  
327296 [k\_\_Bacteria, p\_\_Proteobacteria, c\_\_Deltaproteobacteria, o\_\_, f\_\_, g\_\_, s\_\_]  
4380792 [k\_\_Bacteria, p\_\_Proteobacteria, c\_\_Deltaproteobacteria, o\_\_[Entotheonellales], f\_\_[Entotheonellaceae], g\_\_, s\_\_]  
274620 [k\_\_Bacteria, p\_\_Proteobacteria, c\_\_Deltaproteobacteria, o\_\_Desulfobacterales, f\_\_Nitrospinaceae, g\_\_Nitrospina, s\_\_]  
138264 [k\_\_Bacteria, p\_\_Proteobacteria, c\_\_Deltaproteobacteria, o\_\_Desulfobacterales, f\_\_Nitrospinaceae, g\_\_Nitrospina, s\_\_]  
299227 [k\_\_Bacteria, p\_\_Proteobacteria, c\_\_Deltaproteobacteria, o\_\_Desulfobacterales, f\_\_Nitrospinaceae, g\_\_Nitrospina, s\_\_]  
793842 [k\_\_Bacteria, p\_\_Proteobacteria, c\_\_Deltaproteobacteria, o\_\_Desulfobacterales, f\_\_Nitrospinaceae, g\_\_Nitrospina, s\_\_]  
792011 [k\_\_Bacteria, p\_\_Proteobacteria, c\_\_Deltaproteobacteria, o\_\_Myxococcales, f\_\_, g\_\_, s\_\_]  
572150 [k\_\_Bacteria, p\_\_Proteobacteria, c\_\_Deltaproteobacteria, o\_\_Myxococcales, f\_\_, g\_\_, s\_\_]  
New.ReferenceOTU1232 [k\_\_Bacteria, p\_\_Proteobacteria, c\_\_Deltaproteobacteria, o\_\_NB1-j, f\_\_, g\_\_, s\_\_]  
808856 [k\_\_Bacteria, p\_\_Proteobacteria, c\_\_Deltaproteobacteria, o\_\_NB1-j, f\_\_JTB38, g\_\_, s\_\_]  
659717 [k\_\_Bacteria, p\_\_Proteobacteria, c\_\_Deltaproteobacteria, o\_\_NB1-j, f\_\_JTB38, g\_\_, s\_\_]

317719 [k\_\_Bacteria, p\_\_Proteobacteria, c\_\_Deltaproteobacteria, o\_\_NB1-j, f\_\_JTB38, g\_\_, s\_\_]  
659088 [k\_\_Bacteria, p\_\_Proteobacteria, c\_\_Deltaproteobacteria, o\_\_NB1-j, f\_\_MND4, g\_\_, s\_\_]  
New.ReferenceOTU2273 [k\_\_Bacteria, p\_\_Proteobacteria, c\_\_Deltaproteobacteria, o\_\_NB1-j, f\_\_MND4, g\_\_, s\_\_]  
New.ReferenceOTU2144 [k\_\_Bacteria, p\_\_Proteobacteria, c\_\_Deltaproteobacteria, o\_\_NB1-j, f\_\_MND4, g\_\_, s\_\_]  
New.ReferenceOTU263 [k\_\_Bacteria, p\_\_Proteobacteria, c\_\_Deltaproteobacteria, o\_\_NB1-j, f\_\_MND4, g\_\_, s\_\_]  
250443 [k\_\_Bacteria, p\_\_Proteobacteria, c\_\_Deltaproteobacteria, o\_\_NB1-j, f\_\_NB1-i, g\_\_, s\_\_]  
2495965 [k\_\_Bacteria, p\_\_Proteobacteria, c\_\_Deltaproteobacteria, o\_\_NB1-j, f\_\_NB1-i, g\_\_, s\_\_]  
4437142 [k\_\_Bacteria, p\_\_Proteobacteria, c\_\_Deltaproteobacteria, o\_\_NB1-j, f\_\_NB1-i, g\_\_, s\_\_]  
657368 [k\_\_Bacteria, p\_\_Proteobacteria, c\_\_Deltaproteobacteria, o\_\_NB1-j, f\_\_NB1-i, g\_\_, s\_\_]  
325676 [k\_\_Bacteria, p\_\_Proteobacteria, c\_\_Deltaproteobacteria, o\_\_NB1-j, f\_\_NB1-i, g\_\_, s\_\_]  
4484249 [k\_\_Bacteria, p\_\_Proteobacteria, c\_\_Deltaproteobacteria, o\_\_NB1-j, f\_\_NB1-i, g\_\_, s\_\_]  
1591296 [k\_\_Bacteria, p\_\_Proteobacteria, c\_\_Deltaproteobacteria, o\_\_Sva0853, f\_\_JTB36, g\_\_, s\_\_]  
3211674 [k\_\_Bacteria, p\_\_Proteobacteria, c\_\_Deltaproteobacteria, o\_\_Sva0853, f\_\_JTB36, g\_\_, s\_\_]  
4348974 [k\_\_Bacteria, p\_\_Proteobacteria, c\_\_Deltaproteobacteria, o\_\_Sva0853, f\_\_JTB36, g\_\_, s\_\_]  
4434771 [k\_\_Bacteria, p\_\_Proteobacteria, c\_\_Deltaproteobacteria, o\_\_Sva0853, f\_\_JTB36, g\_\_, s\_\_]  
New.ReferenceOTU337 [k\_\_Bacteria, p\_\_Proteobacteria, c\_\_Deltaproteobacteria, o\_\_Sva0853, f\_\_JTB36, g\_\_, s\_\_]  
4324265 [k\_\_Bacteria, p\_\_Proteobacteria, c\_\_Deltaproteobacteria, o\_\_Syntrophobacteriales, f\_\_Syntrophobacteraceae, g\_\_, s\_\_]  
834257 [k\_\_Bacteria, p\_\_Proteobacteria, c\_\_Deltaproteobacteria, o\_\_Syntrophobacteriales, f\_\_Syntrophobacteraceae, g\_\_, s\_\_]  
239869 [k\_\_Bacteria, p\_\_Proteobacteria, c\_\_Gammaproteobacteria, o\_\_, f\_\_, g\_\_, s\_\_]  
342284 [k\_\_Bacteria, p\_\_Proteobacteria, c\_\_Gammaproteobacteria, o\_\_[Marinicellales], f\_\_[Marinicellaceae], g\_\_, s\_\_]  
4414633 [k\_\_Bacteria, p\_\_Proteobacteria, c\_\_Gammaproteobacteria, o\_\_Alteromonadales, f\_\_OM60, g\_\_, s\_\_]  
4039575 [k\_\_Bacteria, p\_\_Proteobacteria, c\_\_Gammaproteobacteria, o\_\_Chromatiales, f\_\_, g\_\_, s\_\_]  
149753 [k\_\_Bacteria, p\_\_Proteobacteria, c\_\_Gammaproteobacteria, o\_\_Chromatiales, f\_\_, g\_\_, s\_\_]  
544130 [k\_\_Bacteria, p\_\_Proteobacteria, c\_\_Gammaproteobacteria, o\_\_Chromatiales, f\_\_, g\_\_, s\_\_]  
241556 [k\_\_Bacteria, p\_\_Proteobacteria, c\_\_Gammaproteobacteria, o\_\_Chromatiales, f\_\_, g\_\_, s\_\_]  
4480288 [k\_\_Bacteria, p\_\_Proteobacteria, c\_\_Gammaproteobacteria, o\_\_Chromatiales, f\_\_, g\_\_, s\_\_]  
718758 [k\_\_Bacteria, p\_\_Proteobacteria, c\_\_Gammaproteobacteria, o\_\_Chromatiales, f\_\_, g\_\_, s\_\_]  
832176 [k\_\_Bacteria, p\_\_Proteobacteria, c\_\_Gammaproteobacteria, o\_\_Chromatiales, f\_\_, g\_\_, s\_\_]  
1012494 [k\_\_Bacteria, p\_\_Proteobacteria, c\_\_Gammaproteobacteria, o\_\_Chromatiales, f\_\_, g\_\_, s\_\_]  
80943 [k\_\_Bacteria, p\_\_Proteobacteria, c\_\_Gammaproteobacteria, o\_\_Chromatiales, f\_\_, g\_\_, s\_\_]  
247507 [k\_\_Bacteria, p\_\_Proteobacteria, c\_\_Gammaproteobacteria, o\_\_Chromatiales, f\_\_Ectothiorhodospiraceae, g\_\_, s\_\_]  
4352040 [k\_\_Bacteria, p\_\_Proteobacteria, c\_\_Gammaproteobacteria, o\_\_HTCC2188, f\_\_HTCC2089, g\_\_, s\_\_]  
243868 [k\_\_Bacteria, p\_\_Proteobacteria, c\_\_Gammaproteobacteria, o\_\_HTCC2188, f\_\_HTCC2089, g\_\_, s\_\_]  
274135 [k\_\_Bacteria, p\_\_Proteobacteria, c\_\_Gammaproteobacteria, o\_\_Oceanospirillales, f\_\_, g\_\_, s\_\_]  
742886 [k\_\_Bacteria, p\_\_Proteobacteria, c\_\_Gammaproteobacteria, o\_\_Thiotrichales, f\_\_Piscirickettsiaceae, g\_\_, s\_\_]

3726190 [k\_\_Bacteria, p\_\_Proteobacteria, c\_\_Gammaproteobacteria, o\_\_Thiotrichales, f\_\_Piscirickettsiaceae, g\_\_, s\_\_]  
264970 [k\_\_Bacteria, p\_\_Proteobacteria, c\_\_Gammaproteobacteria, o\_\_Thiotrichales, f\_\_Piscirickettsiaceae, g\_\_, s\_\_]  
4300016 [k\_\_Bacteria, p\_\_Proteobacteria, c\_\_Gammaproteobacteria, o\_\_Thiotrichales, f\_\_Piscirickettsiaceae, g\_\_, s\_\_]  
728254 [k\_\_Bacteria, p\_\_Proteobacteria, c\_\_Gammaproteobacteria, o\_\_Thiotrichales, f\_\_Piscirickettsiaceae, g\_\_, s\_\_]  
247606 [k\_\_Bacteria, p\_\_Proteobacteria, c\_\_Gammaproteobacteria, o\_\_Thiotrichales, f\_\_Piscirickettsiaceae, g\_\_, s\_\_]  
257985 [k\_\_Bacteria, p\_\_Proteobacteria, c\_\_Gammaproteobacteria, o\_\_Thiotrichales, f\_\_Piscirickettsiaceae, g\_\_, s\_\_]  
248278 [k\_\_Bacteria, p\_\_Proteobacteria, c\_\_Gammaproteobacteria, o\_\_Thiotrichales, f\_\_Piscirickettsiaceae, g\_\_, s\_\_]  
4041618 [k\_\_Bacteria, p\_\_Proteobacteria, c\_\_Gammaproteobacteria, o\_\_Thiotrichales, f\_\_Piscirickettsiaceae, g\_\_, s\_\_]  
303000 [k\_\_Bacteria, p\_\_Proteobacteria, c\_\_Gammaproteobacteria, o\_\_Thiotrichales, f\_\_Piscirickettsiaceae, g\_\_, s\_\_]  
90324 [k\_\_Bacteria, p\_\_Proteobacteria, c\_\_Gammaproteobacteria, o\_\_Thiotrichales, f\_\_Piscirickettsiaceae, g\_\_, s\_\_]  
271272 [k\_\_Bacteria, p\_\_Proteobacteria, c\_\_Gammaproteobacteria, o\_\_Thiotrichales, f\_\_Piscirickettsiaceae, g\_\_, s\_\_]  
4480536 [k\_\_Bacteria, p\_\_Proteobacteria, c\_\_Gammaproteobacteria, o\_\_Thiotrichales, f\_\_Piscirickettsiaceae, g\_\_, s\_\_]  
95014 [k\_\_Bacteria, p\_\_Proteobacteria, c\_\_Gammaproteobacteria, o\_\_Thiotrichales, f\_\_Piscirickettsiaceae, g\_\_, s\_\_]  
4296905 [k\_\_Bacteria, p\_\_Proteobacteria, c\_\_Gammaproteobacteria, o\_\_Thiotrichales, f\_\_Piscirickettsiaceae, g\_\_, s\_\_]  
265051 [k\_\_Bacteria, p\_\_Proteobacteria, c\_\_Gammaproteobacteria, o\_\_Thiotrichales, f\_\_Piscirickettsiaceae, g\_\_, s\_\_]  
295290 [k\_\_Bacteria, p\_\_Proteobacteria, c\_\_Gammaproteobacteria, o\_\_Thiotrichales, f\_\_Piscirickettsiaceae, g\_\_, s\_\_]  
724681 [k\_\_Bacteria, p\_\_Proteobacteria, c\_\_Gammaproteobacteria, o\_\_Thiotrichales, f\_\_Piscirickettsiaceae, g\_\_, s\_\_]  
239964 [k\_\_Bacteria, p\_\_Proteobacteria, c\_\_Gammaproteobacteria, o\_\_Thiotrichales, f\_\_Piscirickettsiaceae, g\_\_, s\_\_]  
New.ReferenceOTU527 [k\_\_Bacteria, p\_\_Proteobacteria, c\_\_Gammaproteobacteria, o\_\_Thiotrichales, f\_\_Piscirickettsiaceae, g\_\_, s\_\_]  
New.ReferenceOTU909 [k\_\_Bacteria, p\_\_Proteobacteria, c\_\_Gammaproteobacteria, o\_\_Thiotrichales, f\_\_Piscirickettsiaceae, g\_\_, s\_\_]  
263284 [k\_\_Bacteria, p\_\_SBR1093, c\_\_, o\_\_, f\_\_, g\_\_, s\_\_]  
203274 [k\_\_Bacteria, p\_\_SBR1093, c\_\_VHS-B5-50, o\_\_, f\_\_, g\_\_, s\_\_]  
New.ReferenceOTU2406 [Unassigned]
